# Supplementary material for: Management of Dietary Habits and Diarrhea in Fap Individuals: A Mediterranean Low-Inflammatory Dietary Intervention
Source: MDPI journal article supplement (doi:10.3390/nu13113988), 2021-11-09
Supplement: s1 [file s1]

# Supplementary Material

**Table S1. Groups of Recommended, Not Recommended or Neutral foods**

| Label                        | Food decoding                                                                                |
|------------------------------|----------------------------------------------------------------------------------------------|
| Food: <i>Recommended</i>     |                                                                                              |
| BLL_04                       | Vegetable milk without sugar (rise, oats, soybeans, almonds)                                 |
| BLL_06                       | Tea, herbal tea, barley                                                                      |
| BLL_07                       | Unsweetened natural yogurt                                                                   |
| D_03                         | Brown sugar, honey, maple syrup, agave syrup                                                 |
| D_04                         | Malts                                                                                        |
| D_05                         | Jam without sugar                                                                            |
| PC_03                        | Bread and pizza made with durum wheat flour                                                  |
| PC_04                        | Pasta (like spaghetti or macaroni)                                                           |
| PC_11                        | Oats, oatmeal                                                                                |
| PC_12                        | Muesli without sugar                                                                         |
| CPSU_04                      | Fish                                                                                         |
| LVF_01                       | Legumes (beans, lentils, chickpeas, beans, green/red soybeans etc.)                          |
| LVF_02                       | Yellow soybeans, tofu, tempeh                                                                |
| LVF_04                       | Onions, leeks, garlic                                                                        |
| LVF_06                       | Tomato, tomato juice, tomato sauces                                                          |
| LVF_09                       | Green and black olives                                                                       |
| LVF_10                       | Other cooked vegetables (zucchini, pumpkin etc.), vegetable soups                            |
| LVF_11                       | Other raw vegetables (lettuce, other kind of salad, cucumbers etc.)                          |
| LVF_12                       | Berries, pomegranate (including unsweetened fresh juices)                                    |
| LVF_13                       | Apples, pears                                                                                |
| LVF_16                       | Other kind of fresh fruits                                                                   |
| LVF_17                       | Dried fruits, raisins, prunes, apricots                                                      |
| LVF_18                       | Walnuts, hazelnuts, almonds (including creams), oiled seeds                                  |
| SG_01                        | Extra-virgin olive oil                                                                       |
| SG_05                        | Miso, Tamari, tekka                                                                          |
| SG_07                        | Mushroom                                                                                     |
| Food: <i>Not Recommended</i> |                                                                                              |
| BLL_01_01                    | Cow or goat's milk, any kind                                                                 |
| BLL_02                       | Fresh/seasoned cheese of any kind (including those that are used for pizza or pasta)         |
| BLL_03                       | Ricotta, with/without salt                                                                   |
| BLL_08                       | Coca-Cola or other sweetened commercial beverages (fruit juices, vegetable milks and yogurt) |
| BLL_10                       | Alcoholic drinks (wine, beer, spirits etc. etc.)                                             |
| D_01                         | Refined white sugar                                                                          |
| D_02                         | Artificial sweeteners                                                                        |
| D_06                         | Jam with sugar or fructose, glucose, dextrose                                                |
| D_08                         | White or milk chocolate, candies                                                             |

|                      |                                                                                             |
|----------------------|---------------------------------------------------------------------------------------------|
| D_09                 | Cookies, brioches, sweets, brand ice cream                                                  |
| PC_05                | Handmade egg pasta, pasta made with soft-wheat flour                                        |
| PC_10                | Corn, corn flakes                                                                           |
| PC_13                | Muesli with honey or sugar                                                                  |
| CPSU_01              | Red meat (beef and veal, sheep, porks, horses)                                              |
| CPSU_02              | Processed meat (salami, ham, sausages, canned meat)                                         |
| LVF_05               | Potatoes, potato chips, mashed potatoes, dumplings                                          |
| SG_03                | Butter, cream, suet, lard, margarine                                                        |
| SG_04                | Souces, nuts, mayonnaise, ketchup etc.                                                      |
| Food: <i>Neutral</i> |                                                                                             |
| BLL_05               | Cafè                                                                                        |
| BLL_09               | Unsweetened fruit juices                                                                    |
| D_07                 | Dark chocolate                                                                              |
| D_10                 | Cookies, ice cream or other desserts without sugar, fructose, glucose and hydrogenated fats |
| PC_01                | White bread, crackers, biscuits, pretzels, bread sticks, pizza                              |
| PC_02                | Bread, pizza or crisp bread made with wholemeal flour or partial wholemeal flour            |
| PC_06                | White rice, puffed rice                                                                     |
| PC_07                | Whole rice/partial whole rice, basmati rice                                                 |
| PC_08                | Rise cakes                                                                                  |
| PC_09                | Spelt, barley, millet, buckwheat (grains or flakes), quinoa                                 |
| CPSU_03              | White meat or game (chicken, rabbit, turkey, ostrich, pheasant, etc. etc.)                  |
| CPSU_05              | Clams and shellfish                                                                         |
| CPSU_06              | Seitan                                                                                      |
| CPSU_07              | Eggs, omelette                                                                              |
| LVF_03               | Artichokes, cardoons, fennel                                                                |
| LVF_07               | Peppers, eggplants                                                                          |
| LVF_08               | Cabbage, cauliflower, broccoli, turnips, radishes, arugula, daikon, beetroots               |
| LVF_14               | Citrus                                                                                      |
| LVF_15               | Fresh unsweetened fruit juices                                                              |
| SG_02                | Seed oil                                                                                    |
| SG_06                | Spices                                                                                      |

**Table S2.** Five-scale classification criteria of *Recommended* and *Not Recommended* foods at T0 and T1

| <i>Recommended</i> food intake<br>( $\Delta_R = T1 - T0$ ) | <i>Not Recommended</i> food intake ( $\Delta_{NR} = T1 - T0$ ) | category | description                                                                          |
|------------------------------------------------------------|----------------------------------------------------------------|----------|--------------------------------------------------------------------------------------|
| $\Delta_R = 0$                                             | $\Delta_{NR} < 0$                                              | 1        | Stability or decrease of <i>NR</i> foods and stability or increase of <i>R</i> foods |
| $\Delta_R > 0$                                             | $\Delta_{NR} = 0$                                              |          |                                                                                      |
| $\Delta_R > 0$                                             | $\Delta_{NR} < 0$                                              |          |                                                                                      |
| $\Delta_R = 0$                                             | $\Delta_{NR} = 0$                                              | 2        | No changes                                                                           |
| $\Delta_R = 0$                                             | $\Delta_{NR} > 0$                                              | 3        | Increase of <i>NR</i> foods and stability or increase of <i>R</i> foods              |
| $\Delta_R > 0$                                             | $\Delta_{NR} > 0$                                              |          |                                                                                      |
| $\Delta_R < 0$                                             | $\Delta_{NR} = 0$                                              | 4        | Decrease of <i>R</i> foods and stability or decrease of <i>NR</i> foods              |
| $\Delta_R < 0$                                             | $\Delta_{NR} < 0$                                              |          |                                                                                      |
| $\Delta_R < 0$                                             | $\Delta_{NR} > 0$                                              | 5        | Decrease of <i>R</i> foods and increase of <i>NR</i> foods                           |

**Figure S1.** Distribution of the food intake changes between T0 and T1.

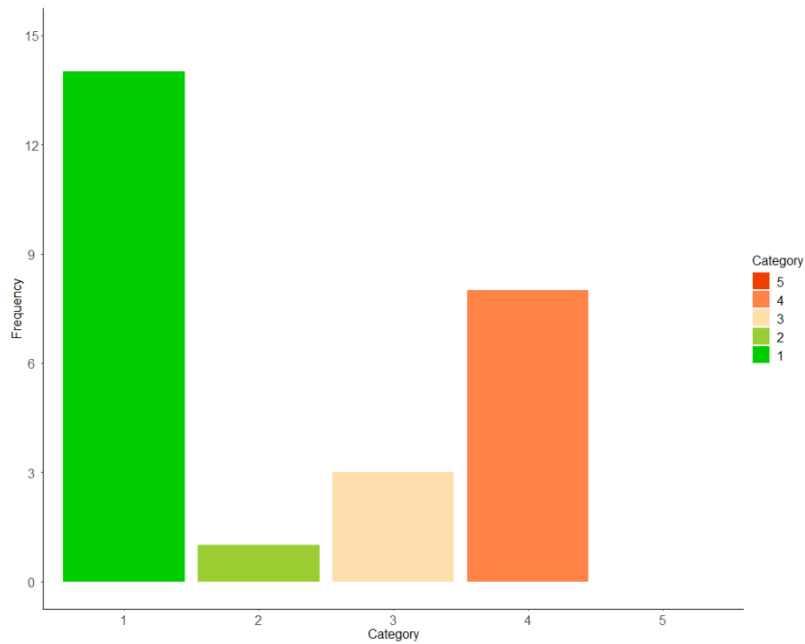

**Figure S1.** Bar plot reporting the changes in the food intake frequency as assessed by the diaries by jointly considering the intake modulation of Recommended and Not Recommended foods.
